# Supplementary material
Source: PubMed Central journal article supplement (PMC8857665)

Funnel plot of Sars-CoV-2 attack rate  
with pseudo 95% confidence limits, egger's test

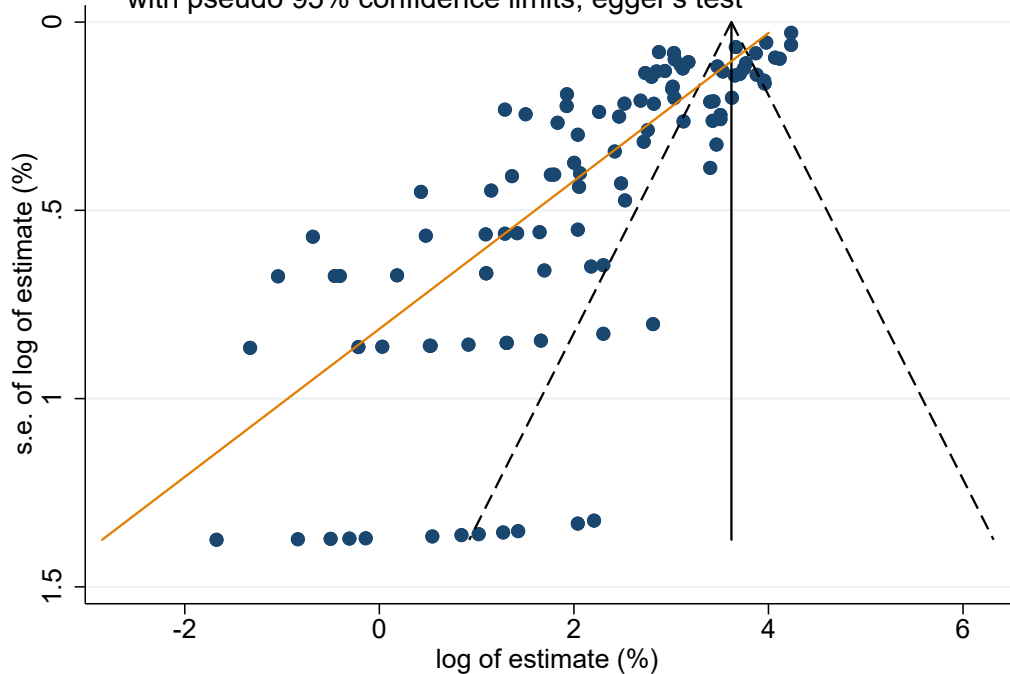

Supplement: mmc3.pdf [file mmc3.pdf]
